# Supplementary material
Source: ML conference proceedings conference paper supplement (https://proceedings.neurips.cc/paper_files/paper/2010/hash/7a53928fa4dd31e82c6ef826f341daec-Abstract.html)
Supplement: Supplementary file [file 7a53928fa4dd31e82c6ef826f341daec-Supplemental.zip]

---

# Deterministic Single-Pass Algorithm for LDA

## –Supporting Material–

---

**Issei Sato**  
University of Tokyo, Japan  
sato@r.dl.itc.u-tokyo.ac.jp

**Kenichi Kurihara**  
Google  
kenichi.kurihara@gmail.com

**Hiroshi Nakagawa**  
University of Tokyo, Japan  
n3@dl.itc.u-tokyo.ac.jp

**Theorem 1.** *If  $\epsilon$  and  $\nu$  exist satisfying  $0 < \epsilon < S_j < \nu$  for any  $j$ ,*

$$\eta_j = \frac{S_j}{\tau + \sum_d^j S_d} \quad (1)$$

*satisfies*

$$\lim_{j \rightarrow \infty} \eta_j = 0, \quad \sum_j \eta_j = \infty, \quad \sum_j \eta_j^2 < \infty \quad (2)$$

*Proof.* If  $\epsilon$  and  $\nu$  exist satisfying  $0 < \epsilon < S_j < \nu$ ,

$$\frac{\epsilon}{\tau + j\nu} < \eta_j = \frac{S_j}{\tau + \sum_d^j S_d} < \frac{\nu}{\tau + j\epsilon}. \quad (3)$$

Moreover, it is known (H.Robbins and S.Monro, 1951) that the following stepsize satisfies the conditions in Eq. (2),

$$\eta_j = \frac{\tau_1}{\tau_2 + j} \quad (\tau_1, \tau_2 > 0). \quad (4)$$

Therefore, since

$$\lim_{j \rightarrow \infty} \frac{\epsilon}{\tau + j\nu} = 0, \quad \lim_{j \rightarrow \infty} \frac{\nu}{\tau + j\epsilon} = 0, \quad (5)$$

$$\sum_j \frac{\epsilon/\nu}{\tau/\nu + j} = \infty, \quad \sum_j \frac{\nu/\epsilon}{\tau/\epsilon + j} = \infty, \quad (6)$$

the squeeze theorem shows

$$\lim_{j \rightarrow \infty} \frac{S_j}{\tau + \sum_d^j S_d} = 0, \quad \sum_j \frac{S_j}{\tau + \sum_d^j S_d} = \infty. \quad (7)$$

Also

$$\sum_j \left( \frac{S_j}{\tau + \sum_d^j S_d} \right)^2 < \sum_j \left( \frac{\nu/\epsilon}{\tau/\epsilon + j} \right)^2 < \infty. \quad (8)$$

□

## References

H.Robbins and S.Monro. A stochastic approximation method. In *Annals of Mathematical Statistics*, pages 400–407, 1951.
